# Supplementary material for: Purification of amoxicillin trihydrate by impurity-coformer complexation in solution
Source: Royal Society of Chemistry journal article supplement (doi:10.1039/c3ce40883c), 2013-01-01
Supplement: c3ce40883c.pdf [file c3ce40883c.pdf]

## Supplementary Material (ESI) for CrystEngComm

### Purification of Amoxicillin Trihydrate by Impurity-Cofomer Complexation in Solution

Kay Huai Ying Hsi,<sup>a</sup> Anthony Joseph Concepcion<sup>a</sup>, Meghan Kenny<sup>a</sup>, Amna Ahmed Magzoub<sup>a</sup> and Allan S. Myerson<sup>a</sup>

<sup>a</sup>Novartis-MIT Center for Continuous Manufacturing and Department of Chemical Engineering, Massachusetts Institute of Technology, 77 Massachusetts Avenue, E19-502b, Cambridge, Massachusetts 02139, United States

#### 1. Complete List of Forty-Seven Compounds Used in Cofomer Screening:

Table 1 Compounds with Amide, Primary, Secondary, and Tertiary Amine Group

(Group I)

| Name                       | Molecular Weight | Structure                                                                             |
|----------------------------|------------------|---------------------------------------------------------------------------------------|
| 1,3 diethylurea            | 116.16           | 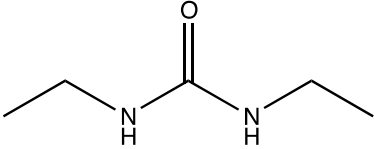  |
| 1,1 diethylurea            | 116.16           |  |
| Urea                       | 60.56            |  |
| 4-benzyloxy-2(1H)-pyridone | 201.22           |  |

Table 2 Compounds with Amide, Primary, Secondary, and Tertiary Amine Group  
(Group I) (Cont'd)

|                                             |        |                                                                                       |
|---------------------------------------------|--------|---------------------------------------------------------------------------------------|
| 6-methyl-4-(trifluoromethyl)-2(1H)-pyridone | 177.12 | 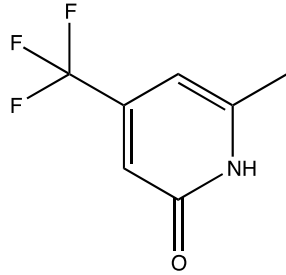   |
| 5-bromo-2(1H)-pyridone                      | 174    |    |
| 2-hydroxypyridine                           | 95.1   |   |
| 2-imidazolidone                             | 86.09  |  |
| 3-nitrobenzamide                            | 166.13 |  |
| 4-chlorobenzamide                           | 155.58 |  |

Table 3 Compounds with Amide, Primary, Secondary, and Tertiary Amine Group  
(Group I) (Cont'd)

|                      |        |                                                                                       |
|----------------------|--------|---------------------------------------------------------------------------------------|
| 3,5-dinitrobenzamide | 211.13 | 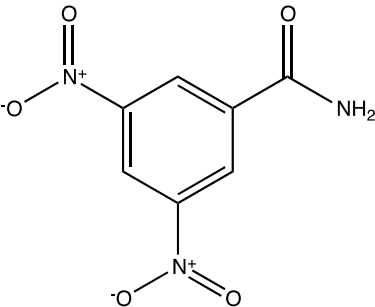   |
| Theobromine          | 180.16 |    |
| Carbamazepine        | 236.27 |  |
| Acetamide            | 59.07  |  |
| N-phenylurea         | 136.15 |  |
| Imidazole            | 68.08  |  |

Table 4 Compounds with Amide, Primary, Secondary, and Tertiary Amine Group  
(Group I) (Cont'd)

|                             |        |                                                                                       |
|-----------------------------|--------|---------------------------------------------------------------------------------------|
| Malonamide                  | 102.09 | 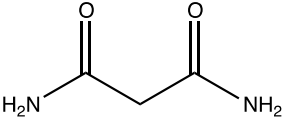   |
| 4,6-dihydropyrimidine       | 112.09 |    |
| Benzamidine                 | 120.15 |    |
| 1,2-bis(4-pyridyl)ethane    | 184.24 |   |
| 1,2-di(4-pyridyl)ethylene   | 182.22 |  |
| 2-amino-3,5-dibromopyrazine | 252.89 |  |
| 2-amino-3,5-dibromopyridine | 251.91 |  |

Table 5 Compounds with Amide, Primary, Secondary, and Tertiary Amine Group  
(Group I) (Cont'd)

|                            |        |                                                                                       |
|----------------------------|--------|---------------------------------------------------------------------------------------|
| 2-amino-5-bromopyrazine    | 174.00 | 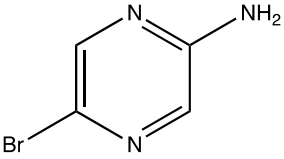   |
| 2-amino-5-bromopyridine    | 173.01 |    |
| 2-aminopyridine            | 94.11  |    |
| 4-(dimethylamino)-pyridine | 122.17 |   |
| Benzamide                  | 121.14 |  |
| Isonicotinamide            | 122.12 |  |
| Nicotinamide               | 122.12 |  |

Table 6 Compounds with Amide, Primary, Secondary, and Tertiary Amine Group  
(Group I)(Cont'd)

|                  |        |                                                                                     |
|------------------|--------|-------------------------------------------------------------------------------------|
| 4-phenylpyridine | 155.20 | 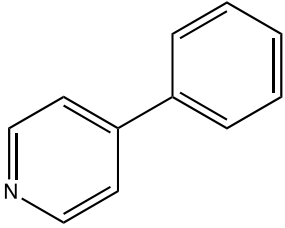 |
|------------------|--------|-------------------------------------------------------------------------------------|

Table 7 Compounds with Carboxylic Acid Group (Group II)

| Name            | Molecular Weight | Structure                                                                            |
|-----------------|------------------|--------------------------------------------------------------------------------------|
| Oxalic acid     | 90.03            | 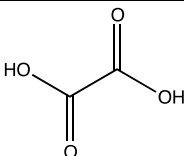   |
| L-malic acid    | 134.09           |   |
| L-tartaric acid | 150.087          |  |
| Succinic acid   | 118.09           |  |
| Malonic acid    | 104.06           |  |
| Fumaric acid    | 116.07           |  |

Table 8 Compounds with both Carboxylic Acid and Amine Group (Group III)

| Name             | Molecular Weight | Structure                                                                            |
|------------------|------------------|--------------------------------------------------------------------------------------|
| 2-picolinic acid | 123.11           | 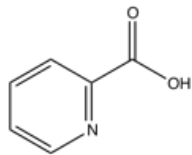   |
| L-leucine        | 131.17           |    |
| L-Lysine         | 146.19           |    |
| L-methionine     | 149.21           |  |
| L-phenylalanine  | 165.19           |  |
| L-threonine      | 119.12           |  |

Table 9 Compounds with both Carboxylic Acid and Amine Group (Group III) (Cont'd)

|              |        |                                                                                      |
|--------------|--------|--------------------------------------------------------------------------------------|
| L-tryptophan | 204.23 | 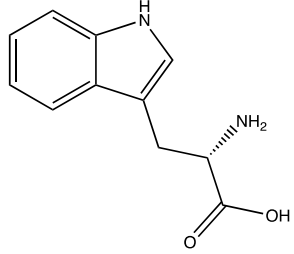   |
| L-histidine  | 155.15 |    |
| L-isoleucine | 131.17 |   |
| L-valine     | 117.15 |  |



## 2. X-ray Powder Diffraction Patterns for 4HPG Cocrystals:

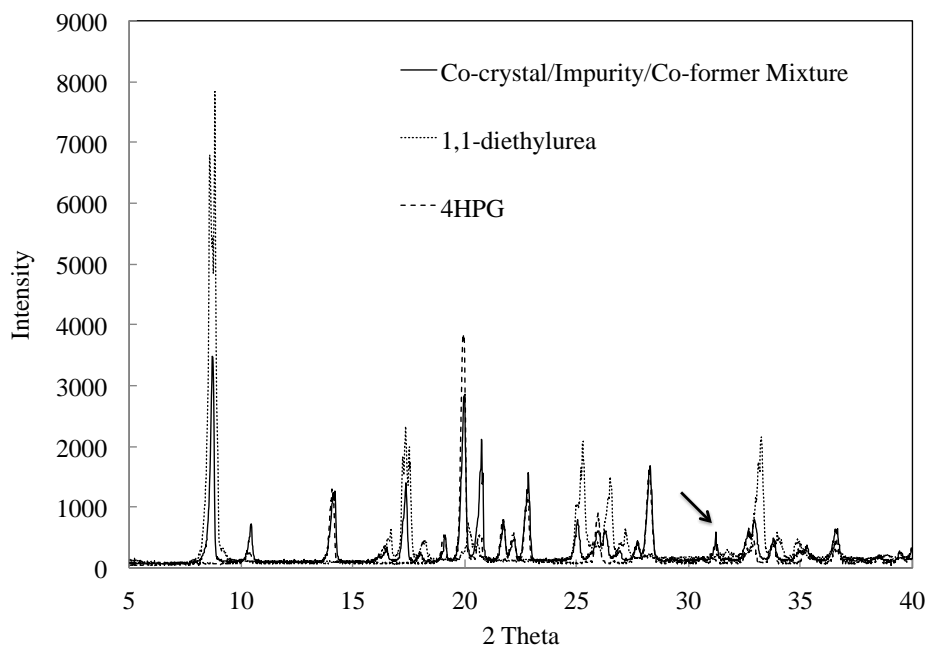

Figure 1 The Comparison between the Powder Pattern of the Cocrystal/4HPG/1,1-diethylurea Mixture and the Powder Patterns of the Individual Components.

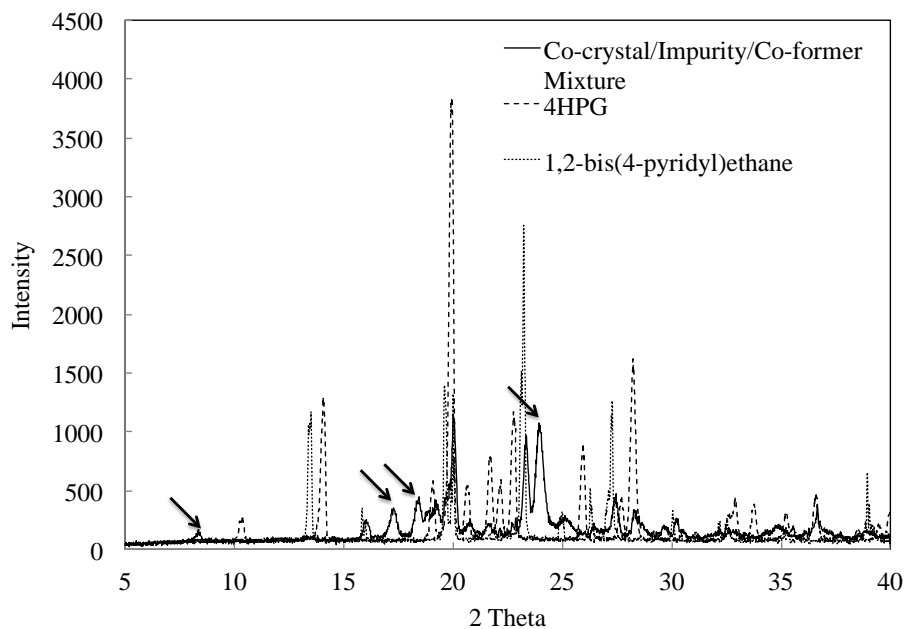

Figure 2 The Comparison between the Powder Pattern of the Cocrystal/4HPG/1,2-bis(4-pyridyl)ethane Mixture and the Powder Patterns of the Individual Components.

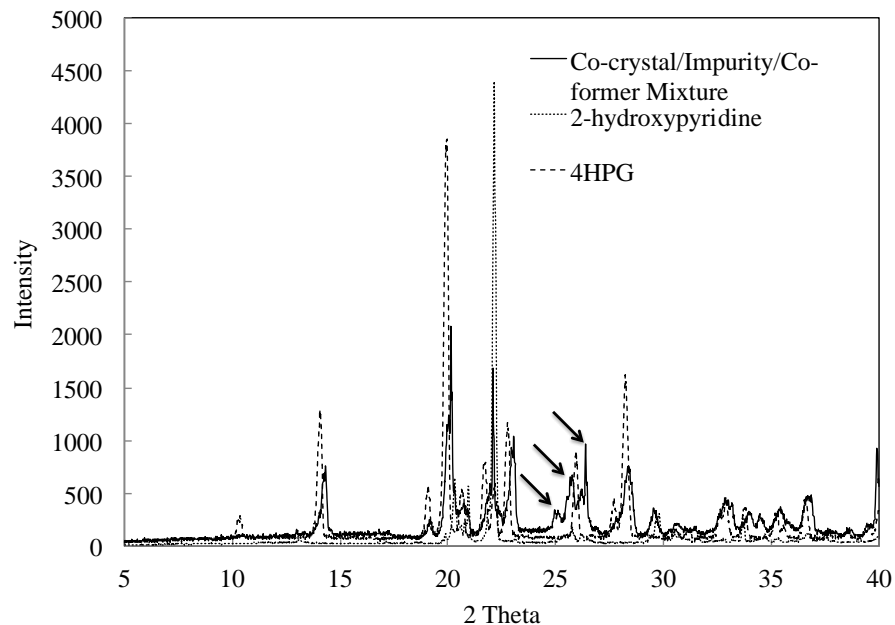

Figure 3 The Comparison between the Powder Pattern of the Cocystal/4HPG/2-hydroxypyridine and the Powder Patterns of the Individual Components.

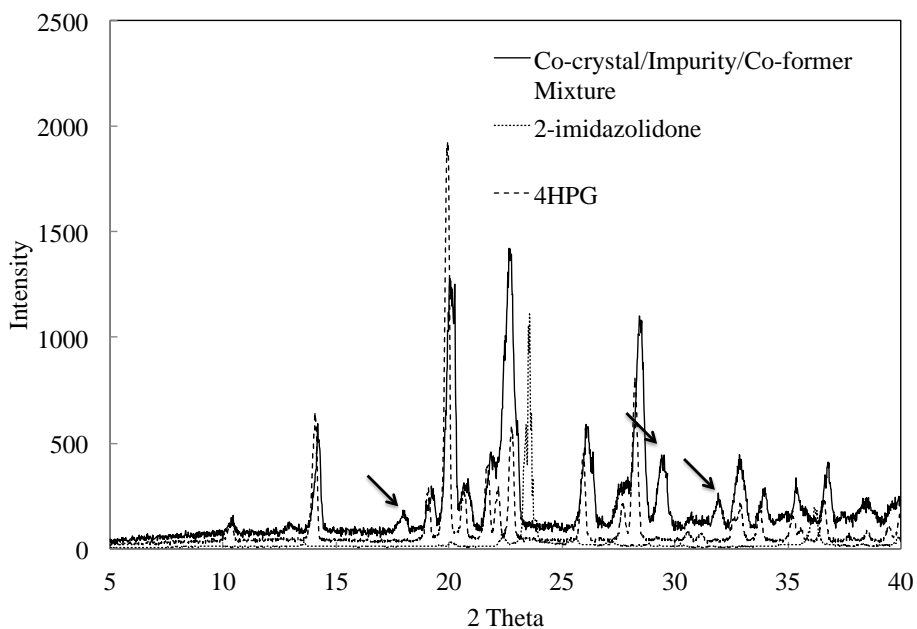

Figure 4 The Comparison between the Powder Pattern of the Cocystal/4HPG/2-imidazolidone Mixture and the Powder Patterns of the Individual Components.

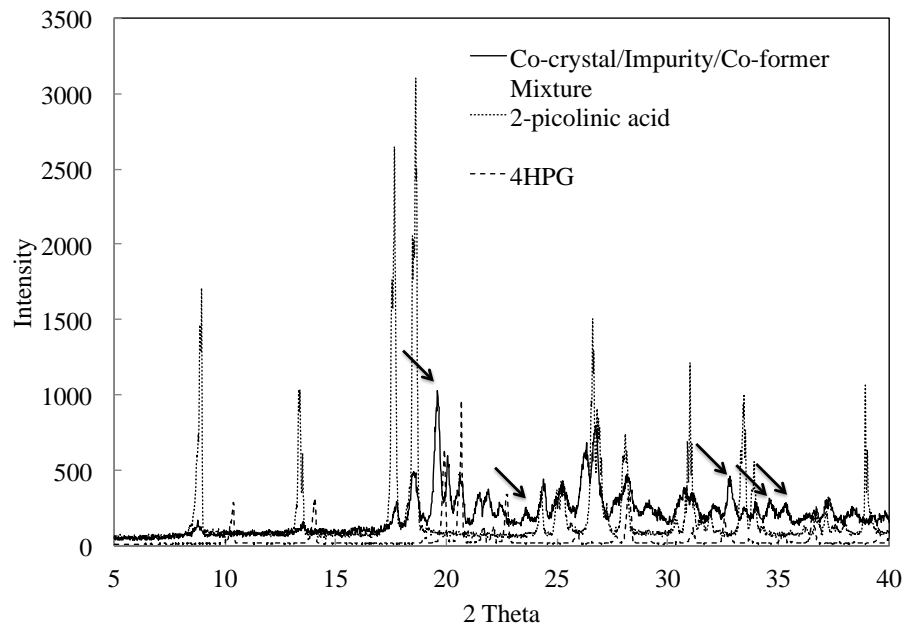

Figure 5 The Comparison between the Powder Pattern of the Cocystal/4HPG/2-picolinic acid Mixture and the Powder Patterns of the Individual Components.

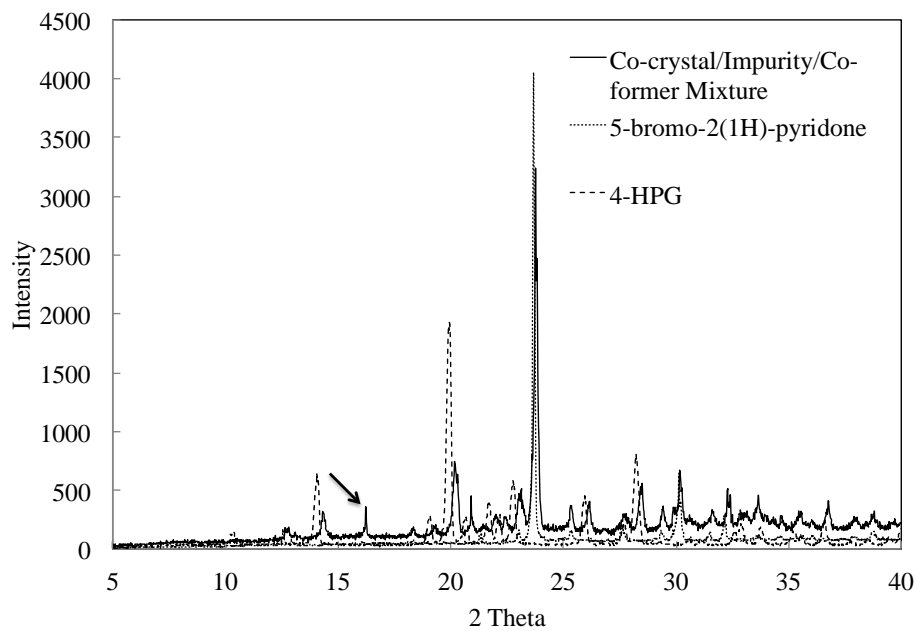

Figure 6 The Comparison between the Powder Pattern of the Cocystal/4HPG/5-bromo-2(1H)-pyridone Mixture and the Powder Patterns of the Individual Components.

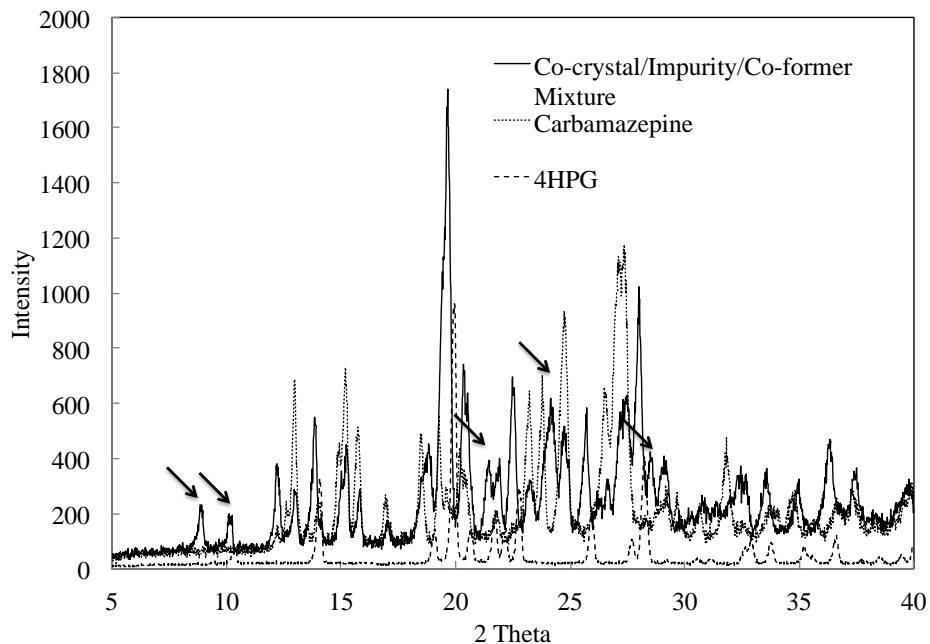

Figure 7 The Comparison between the Powder Pattern of the Cocystal/4HPG/Carbamazepine Mixture and the Powder Patterns of the Individual Components.

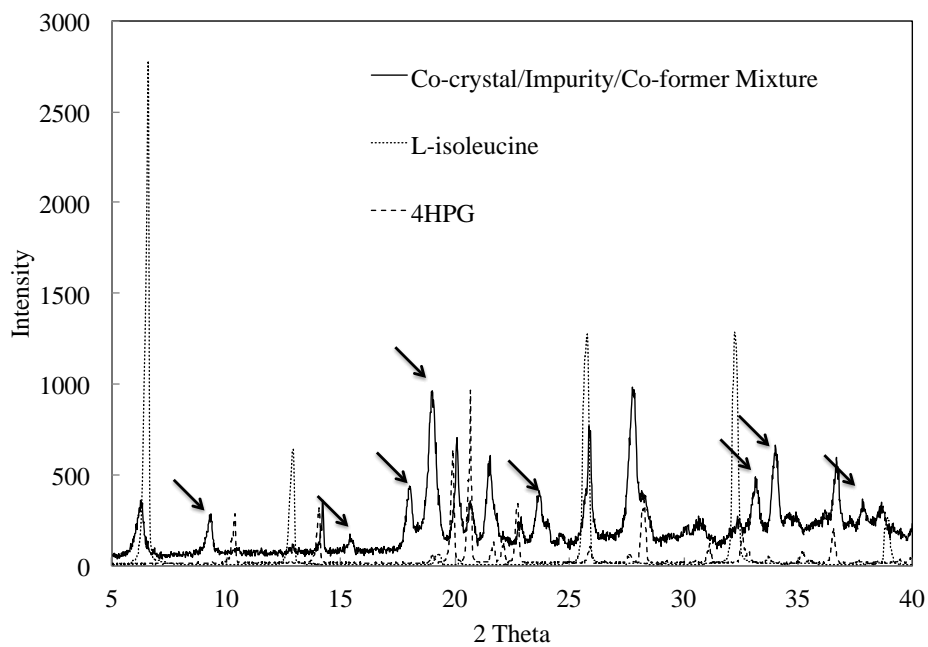

Figure 8 The Comparison between the Powder Pattern of the Cocystal/4HPG/L-isoleucine Mixture and the Powder Patterns of the Individual Components.

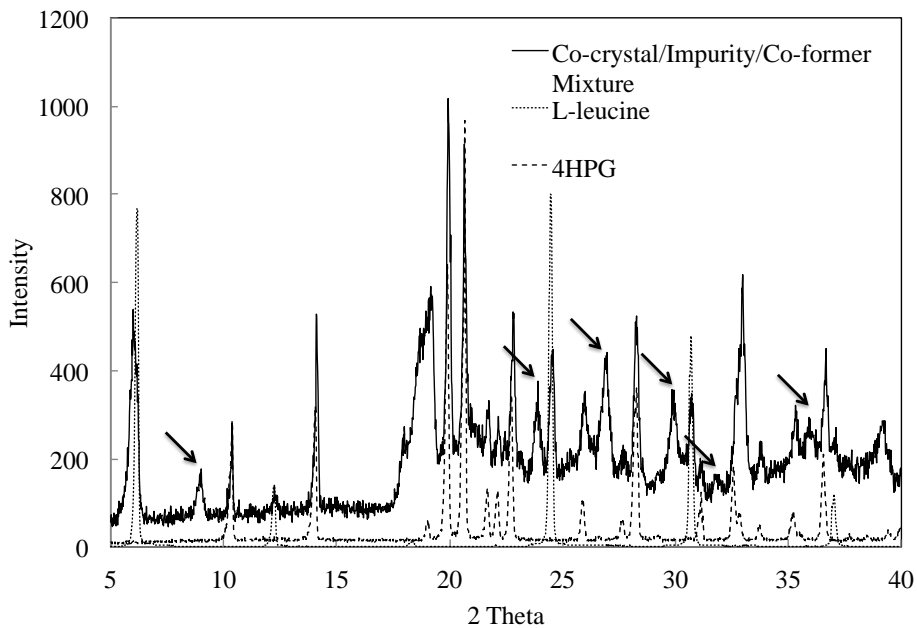

Figure 9 The Comparison between the Powder Pattern of the Cocystal/4HPG/L-leucine Mixture and the Powder Patterns of the Individual Components.

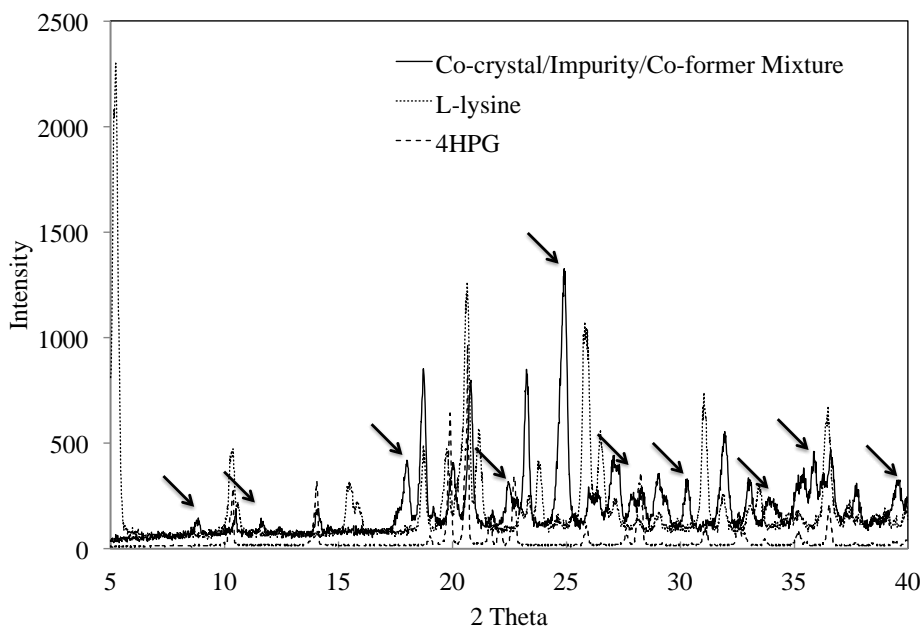

Figure 10 The Comparison between the Powder Pattern of the Cocystal/4HPG/L-lysine Mixture and the Powder Patterns of the Individual Components.

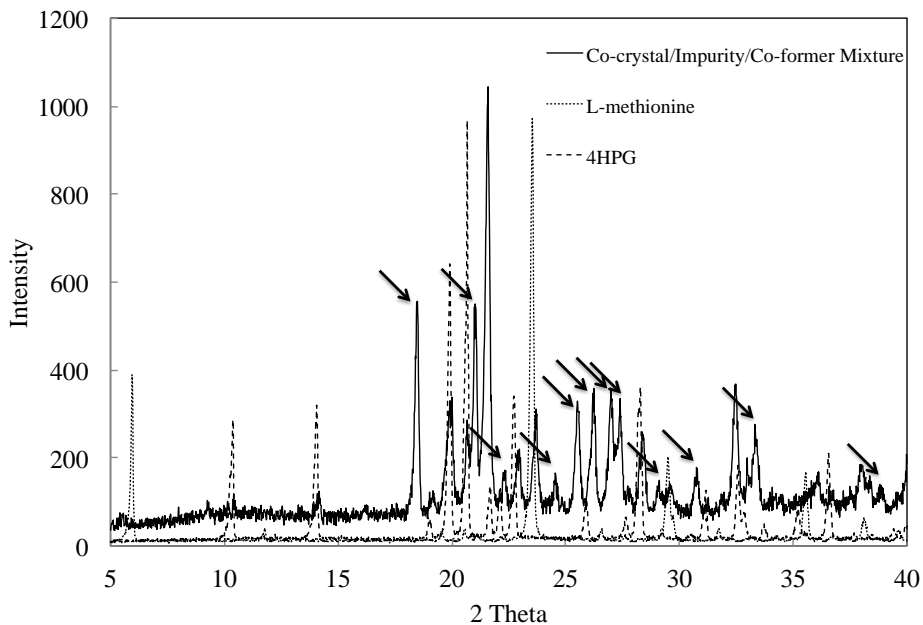

Figure 11 The Comparison between the Powder Pattern of the Cocystal/4HPG/L-methionine Mixture and the Powder Patterns of the Individual Components.

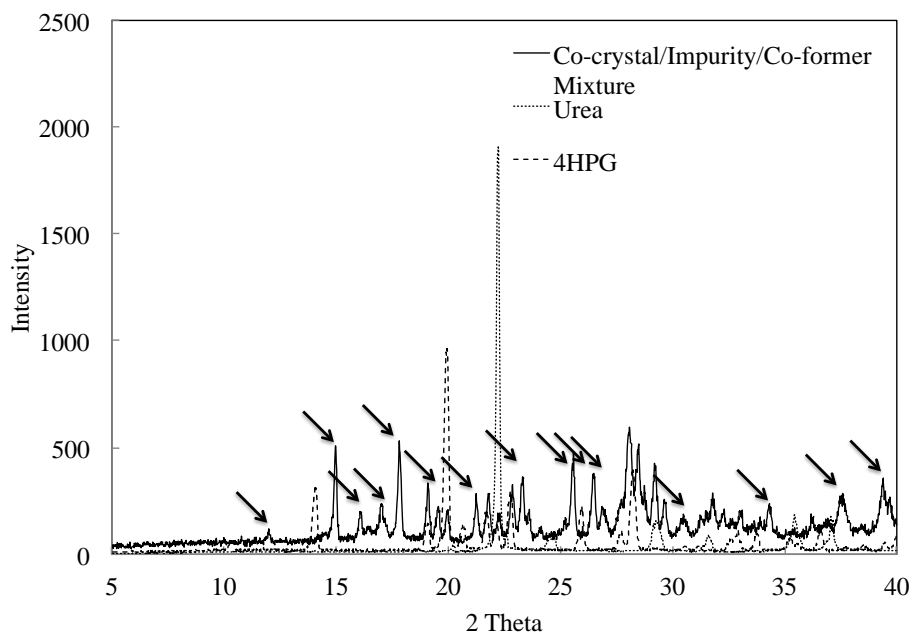

Figure 12 The Comparison between the Powder Pattern of the Cocystal/4HPG/Urea Mixture and the Powder Patterns of the Individual Components.

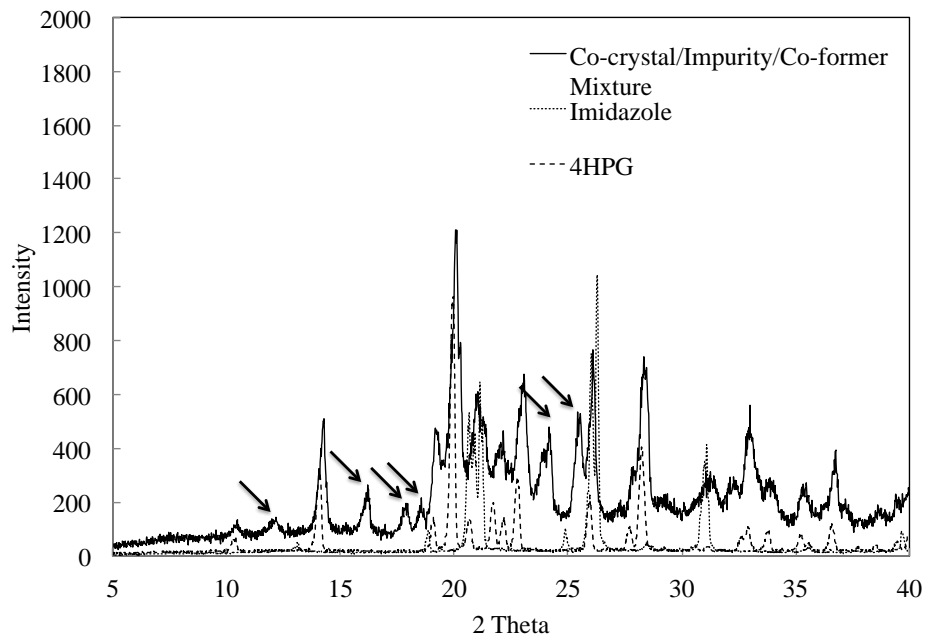

Figure 13 The Comparison between the Powder Pattern of the Cocrystal/4HPG/Imidazole Mixture and the Powder Patterns of the Individual Components.

3. Effect of Coformer Amount Added on the Amount of 4HPG Incorporated into AMCT Crystal Lattice.

Table 10. Effect of Coformer Amount Added on the Amount of 4HPG Incorporated into AMCT Crystal Lattice.

| Coformer         | Coformer-to-4HPG Molar Ratios (r) | Amount of 4HPG (%) | Decreased (%) |
|------------------|-----------------------------------|--------------------|---------------|
| 2-picolinic acid | 0.1                               | 0.92±0.01          | 6             |
|                  | 0.5                               | 0.16±0.01          | 84            |
|                  | 1                                 | 0.17±0.01          | 83            |
|                  | 1.5                               | 0.15±0.01          | 85            |
| L-lysine         | 0.1                               | 0.89±0.07          | 9             |
|                  | 0.5                               | 0.15±0.01          | 85            |
|                  | 1                                 | 0.17±0.01          | 83            |
|                  | 1.5                               | 0.18±0.01          | 82            |
| L-leucine        | 0.1                               | 0.87±0.06          | 11            |
|                  | 0.5                               | 0.48±0.03          | 51            |
|                  | 1                                 | 0.12±0.01          | 88            |
|                  | 1.5                               | 0.13±0.01          | 87            |
| L-isoleucine     | 0.1                               | 0.79±0.08          | 19            |
|                  | 0.5                               | 0.42±0.03          | 57            |
|                  | 1                                 | 0.15±0.01          | 85            |
|                  | 1.5                               | 0.12±0.01          | 88            |
